# Supplementary material
Source: HighWire-hosted journal article supplement (http://ajnr-stage2.highwire.org/highwire/filestream/92766/field_highwire_adjunct_files/0/0510.pdf)
Supplement: 0510.pdf [file 0510.pdf]

|               | Presentation                                                         | Neurological Examination Findings                                                                                                   | CSF Studies                                                                                   | Other Laboratory Studies                                                                                                                                                                                                                                                                      | Treatment                                                                              | Outcome                                                             |
|---------------|----------------------------------------------------------------------|-------------------------------------------------------------------------------------------------------------------------------------|-----------------------------------------------------------------------------------------------|-----------------------------------------------------------------------------------------------------------------------------------------------------------------------------------------------------------------------------------------------------------------------------------------------|----------------------------------------------------------------------------------------|---------------------------------------------------------------------|
| <b>Case 1</b> | Rapidly ascending numbness, gait instability, and fecal incontinence | Sensory ataxia with preserved strength, hyperreflexia, and decreased vibration sense in length dependent pattern                    | Cell count: 49 uL (Range: 0 - 5 /uL);<br>Protein: 54 mg/dL (14 - 45 mg/dL);<br>Normal glucose | Normal vitamin B12, methylmalonic acid, vitamin E, and copper levels<br>Negative Epstein-Barr and Coxsackie virus antibodies<br>GM1 Abs: 160 IV (Range: 0 - 50 IV)<br>Westergren sedimentation rate: 40 mm/hr (Range: 0 - 20 mm/hr)<br>C-reactive protein: 1.0 mg/dL (Range: 0.0 - 0.8 mg/dL) | Oral prednisone taper.<br><br>5 sessions of plasma exchange therapy                    | Near complete resolution of symptoms 3 months later                 |
| <b>Case 2</b> | Lower extremity weakness and constipation                            | Lower extremity weakness, increased tone, reduced vibration and proprioception in a length dependent pattern                        | Normal cell count, protein, and glucose levels                                                | Normal vitamin B12, methylmalonic acid, vitamin E, and copper levels<br>Westergren sedimentation rate: 13 mm/hr (Range: 0 - 10 mm/hr)<br>C-reactive protein: 1.4 mg/dL (Range: 0.0 - 0.8 mg/dL)<br>MTHFR Mutation: Heterozygous for C665T and A1286C                                          | 5 days of intravenous immunoglobulin followed by 5 sessions of plasma exchange therapy | Minimal improvement after inpatient rehabilitation                  |
| <b>Case 3</b> | Lower extremity weakness, low back pain, and constipation            | Lower extremity weakness and hyperreflexia                                                                                          | Normal cell count, protein and glucose levels<br><br>11 unique oligoclonal bands              | Normal vitamin B12 and copper levels<br>Westergren sedimentation rate: 131 mm/hr (0 - 20 mm/hr)<br>C-reactive protein: Normal range                                                                                                                                                           | 3 days of high dose intravenous methylprednisolone                                     | Worsening symptoms over several months with new spinal cord lesions |
| <b>Case 4</b> | Back pain, fever, and cough                                          | Mild upper extremity weakness                                                                                                       | No CSF studies obtained                                                                       | Normal vitamin B12 level                                                                                                                                                                                                                                                                      | None                                                                                   | Unknown                                                             |
| <b>Case 5</b> | Gait instability and sensory changes                                 | Sensory ataxia with preserved strength, hyperreflexia, and decreased vibration and proprioception sense in length dependent pattern | No CSF studies obtained                                                                       | Normal B12 level<br>Undetectable copper level                                                                                                                                                                                                                                                 | Copper supplementation                                                                 | No improvement in symptoms after copper repletion                   |
